# Supplementary material
Source: Springer Nature journal article supplement (https://www.springermedizin.de/resource/supplementary/12882_2014_806_MOESM4_ESM.pdf/9454344)

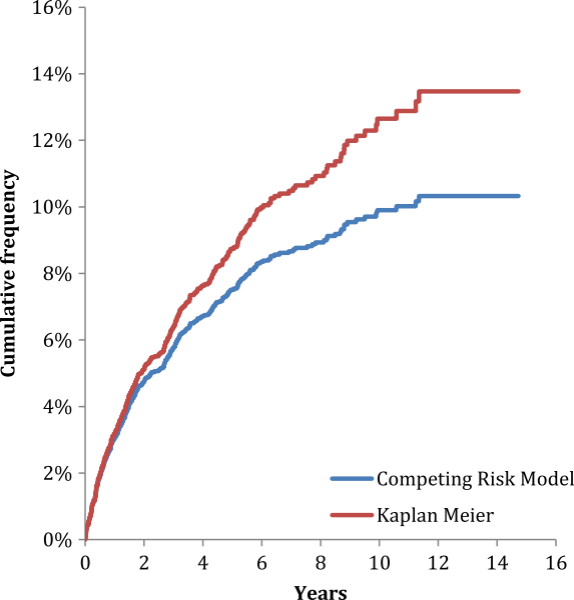

Supplement: MOESM4 [file 9454344]
